# Supplementary material for: Presence of a Prophage Determines Temperature-Dependent Capsule Production in Streptococcus pyogenes
Source: Genes (Basel). 2016 Sep 24;7(10):74. doi: 10.3390/genes7100074 (PMC5083913; doi:10.3390/genes7100074)
Supplement: Supplementary file 1 [file genes-07-00074-s001.xlsx]

## Sheet: Sheet1
Mutation sites in the chromosome of spontaneous capsule thermoregulation mutants
Capsule mutant 1
chr_start	chr_end	ref_base	alt_base	geneID	gene product	mutation type
157226	157226	C	T	L897_00955	SLO	Missense mutation, L -> F
285981	285985	TTAGA	TCTAGA	L897_01565	CovS	1 bp insertion
777453	777462	AAACAAAACA	-	L897_04020	Collagen-like cell surface protein	10 bps deletion
1379728	1379728	G	T	L897_07135	PTS mannose transporter subunit IIAB	Missense mutation, V -> F
1451698	1497226		Deletion	L897_07450 - L897_07770	Prophage gene (ΦHSC5.3)	Deletion of the whole prophage
Capsule mutant 2
chr_start	chr_end	ref_base	alt_base	geneID	gene product	mutation type
157226	157226	C	T	L897_00955	SLO	Missense mutation, L -> F
777458	777462	AAACA	-	L897_04020	Collagen-like cell surface protein	5 bps deletion
1379728	1379728	G	T	L897_07135	PTS mannose transporter subunit IIAB	Missense mutation, V -> F
1457218	1457218	G	T	L897_07470	hypothetical protein	Missense mutation, C -> F
1488922	1488922	T	C	L897_07685	hypothetical protein	Missense mutation, V -> A
1451698	1497226		Deletion	L897_07450 - L897_07770	Prophage gene (ΦHSC5.3)	Deletion of the whole prophage
